# Supplementary material for: The implementation of expectancy-based strategic processes is delayed in normal aging
Source: PubMed Central journal article supplement (PMC6433268; doi:10.1371/journal.pone.0214322), 2019-03-25
Supplement: pone.0214322.s006.pdf [file pone.0214322.s006.pdf]

**S1 Appendix. List of prime-target pairs used in Experiments 3 and 4.** Mean (SD) functional and visual similarity rates in a rating similarity pilot study (1= not at all similar; 7 = highly similar), for animal and inanimate-object pictures (and their English translations), presented as semantically related prime-target pairs.

---

| Prime            | Target         | Functional Similarity | Visual Similarity |
|------------------|----------------|-----------------------|-------------------|
| Gato (cat)       | Perro (dog)    | 5.75 (1.16)           | 5.44 (1.12)       |
| Gorila (gorilla) | Mono (monkey)  | 6.21 (0.94)           | 5.10 (1.39)       |
| Oveja (sheep)    | Cabra (goat)   | 5.39 (1.07)           | 5.14 (1.19)       |
| Tigre (tiger)    | León (lion)    | 5.89 (1.03)           | 5.12 (1.24)       |
| Tornillo (bolt)  | Tuerca (screw) | 6.38 (0.96)           | 5.66 (0.99)       |
| Cuchara (spoon)  | Tenedor (fork) | 6.06 (1.14)           | 5.23 (1.34)       |
| Taza (cup)       | Vaso (glass)   | 6.58 (0.71)           | 5.02 (1.61)       |
| Bota (boot)      | Zapato (shoe)  | 6.77 (0.48)           | 5.01(1.53)        |

---
